# Supplementary material
Source: publisher site journal article supplement (https://www.spandidos-publications.com/1902/downloadSupplementary)
Supplement: Supplementary file 1 [file downloadSupplementary]

## Sheet: Sheet1
Table SIII. Change of expression in miRNAs.
miRNA expressional difference	Expression average of tumor samples	Expression average of normal samples	id	TCGA-78-7163-11A-01H-2065-13	TCGA-49-6742-11A-01H-2169-13	TCGA-44-7672-11A-01H-2065-13	TCGA-44-6778-11A-01H-2169-13	TCGA-93-7348-11A-01H-2038-13	TCGA-55-7724-11A-01H-2169-13	TCGA-55-7726-11A-01H-2169-13	TCGA-91-6836-11A-01H-2169-13	TCGA-55-7910-11A-01H-2169-13	TCGA-44-6777-11A-01H-2169-13	TCGA-55-7283-11A-01H-2038-13	TCGA-50-5933-11A-01H-2169-13	TCGA-55-7903-11A-01H-2169-13	TCGA-50-7109-11A-01H-2038-13	TCGA-49-6744-11A-01H-2169-13	TCGA-44-2657-11A-01R-1757-13	TCGA-44-2665-11A-01R-1757-13	TCGA-44-7662-11A-01H-2065-13	TCGA-44-2668-11A-01R-1757-13	TCGA-44-7659-11A-01H-2065-13	TCGA-55-7914-11A-01H-2169-13	TCGA-49-6745-11A-01H-2169-13	TCGA-78-7540-11A-01H-2065-13	TCGA-49-6743-11A-01H-2169-13	TCGA-86-7713-11A-01H-2065-13	TCGA-44-6144-11A-01H-2169-13	TCGA-55-7574-11A-01H-2038-13	TCGA-55-7570-11A-01H-2038-13	TCGA-44-3398-11B-01R-1757-13	TCGA-44-2661-11A-01R-1757-13	TCGA-91-6835-11A-01H-2169-13	TCGA-50-5930-11A-01H-2169-13	TCGA-55-7576-11A-01H-2065-13	TCGA-44-7671-11A-01H-2065-13	TCGA-44-3396-11A-01R-1757-13	TCGA-86-7711-11A-01H-2065-13	TCGA-44-7661-11A-01H-2065-13	TCGA-44-7667-11A-01H-2065-13	TCGA-50-5932-11A-01H-2169-13	TCGA-55-7725-11A-01H-2169-13	TCGA-55-7911-11A-01H-2169-13	TCGA-44-7669-11A-01H-2065-13	TCGA-44-6776-11A-01H-2169-13	TCGA-44-7670-11A-01H-2065-13	TCGA-44-2655-11A-01R-1757-13	TCGA-44-7660-11A-01H-2065-13
miRNAdown	709.065	114.51	hsa-mir-195	517	1792	534	1892	1009	936	869	669	519	254	590	722	148	355	1056	30	28	664	11	473	780	2453	888	1628	651	820	733	347	44	29	786	803	608	712	22	494	1140	580	1506	1609	196	442	1327	487	20	444
miRNAdown	0.195652	14.6315	hsa-mir-373	0	0	0	1	0	0	0	1	0	0	4	0	0	0	0	0	0	0	0	0	0	0	0	0	0	0	0	0	0	0	0	0	0	2	0	0	0	1	0	0	0	0	0	0	0	0
[truncated: 521 more columns]
